# Supplementary material
Source: publisher figshare collection journal article supplement (https://gsajournals.figshare.com/ndownloader/files/22811837)
Supplement: Supplementary file 1 [file 22811837]

## Sheet: Sheet1
Table X	Oligonucleotides used in this study
Number	Sequence	Description	Use
1625	GGTTAAACTTGGAGCAGGAACCGCTTCCAACCGTGTGAGATGTCAACAA TATGGAGGATATGGAGCCACTGGTGTTCAGC	5' FITC labeled 80mer for injection into germline	assessment of plasmid localization in germline
2352	TGGATAACCGTATTACCGCC	to amplify entire insert in pLF3FShC plasmids	characterization of insertions in Figure S3
3794	TCTACGATGCATGCCCCAACTGCACAGAACAAAAAC	to amplify the phat-5 and Y8A9A.2 promoters	to construct plasmids NM3672, NM3673
3891	AGGACCCTTGGCTAGCATGGTCTCAAAGGGTGAAGAAG	to amplify mCherry gene	to construct plasmid NM2262
3892	CTTATACAATTCATCCATGCCACCTG	to amplify mCherry gene	to construct plasmid NM2262
3893	GATGAATTGTATAAGggatcctgaaaattgtctagaattgtctgaac	to amplify the elks-1 3'UTR	to construct plasmid NM2262
3894	gaaagatcgggaaacaaatgtc	to amplify the elks-1 3'UTR	to construct plasmid NM2262
3895	gtttcccgatctttcAATAAAGGTTGTATATTTATTCATCTTATTGAATC	to amplify the gpd-2/3 intragenic sl2 trans splice region	to construct plasmid NM2262
3896	CCCTTGCTCACCATGGATGCGTTGAAGCAGTTTCC	to amplify the gpd-2/3 intragenic sl2 trans splice region	to construct plasmid NM2262
3907	gatccggagctaccaacttctcccttctcaagcaggctggagacgttgaggagaacccaggacc	encodes the Viral 2A peptide	to construct plasmid NM2267
3908	catgggtcctgggttctcctcaacgtctccagcctgcttgagaagggagaagttggtagctccg	encodes the Viral 2A peptide	to construct plasmid NM2267
4793	gcattcacttcactcagatgc	to amplify from tbb-2 3' UTR toward 5'	to characterize jsIs1528 in figure S3 H
5008	GTTGGAACCTCTTACGTGCC	to amplify inserts of DR274 plasmids	to construct plasmids NM3811, NM3813, NM3814
5074	ttGAATTCCTCGAGATCAATACTGGGAAGACGAAA	to amplify the U6 promoter	to construct plasmid NM3055
5075	GCCAAGCTTCACAGCCGACTATGTTTGGCGTC	to amplify sgRNA and U6 terminator	to construct plasmid NM3055
5076	gagacccggatccttggtctctCAAACATTTAGATTTGCAATTCAA	to amplify the U6 promoter	to construct plasmid NM3055
5077	gagaccaaggatccgggtctcaGTTTTAGAGCTAGAAATAGCAAGTT	to amplify sgRNA and U6 terminator	to construct plasmid NM3055
5078	ggtggttcgacagtcaaggt	to perform inverse PCR of miniMos insertions
5079	agagcaaacgcggacagtat	to perform inverse PCR of miniMos insertions
5080	cgataaatatttacgtttgcgagac	to perform inverse PCR of miniMos insertions
5085	atagtttggcgcgaattgag	to perform inverse PCR of miniMos insertions
5685	AGTCGTAGATCTGAGACACACTTTGCTTTATTAAATAATACCG	to amplify from within the mec-4 promoter	characterization of jsIs1528 insertion in Figure S3 H
5845	AAACTGCAGcaccctctcaacaccatcaatac	to amplify the phat-5 promoter	to construct plasmid NM3358
5846	tttGGTAACCTCgctagcCATttttgttagattggtaggagctgg	to amplify the phat-5 promoter	to construct plasmid NM3358
5866	AAATCATGAGCTCCTTCTCCATCACC	to amplify ANF-EMD	to construct plasmid NM3366
5867	CGGCCGCGACTCTAGATC	to amplify ANF-EMD	to construct plasmid NM3366
5946	CTAGATGGCGAAGAGCccatggatccactagtaacatatgtgcaggcctGCTCTTCGGTA	double stranded polylinker	to construct plasmid NM3410
5968	AGCTTACCGAAGAGCaggcctgcacatatgttactagtggatccatggGCTCTTCGCCAT	double stranded polylinker	to construct plasmid NM3410
5992	tttgaattccgcttcctcgctcactg	to remove SapI site by site directed mutagenesis	to construct plasmid NM3421
5993	TTTGAATTcgcccaatacgcaaaccgc	to remove SapI site by site directed mutagenesis	to construct plasmid NM3421
5997	ccttGCGGCCGCTCTTCgCTTGTAGAGCTCGTCCATTCC	to amplify UAS 11X GFP-C1	to construct plasmid NM3754
6038	AATTCGCTCTTCgGGTAGAGACCgcaatGGATCCaaccattGGTCTCAACGcGAAGAGCA	double stranded polyllnker	to construct plasmid NM3456
6039	AGCTTGCTCTTCgCGTTGAGACCaatggttGGATCCattgcGGTCTCTACCcGAAGAGCG	double stranded polyllnker	to construct plasmid NM3456
6057	AATTCGCTCTTCgTGGAGAGACCgcaatGGATCCaaccattGGTCTCAGCGAGAAGAGCA	double stranded polyllnker	to construct plasmid NM3467
6058	AGCTTGCTCTTCTCGCTGAGACCaatggttGGATCCattgcGGTCTCTCCAcGAAGAGCG	double stranded polyllnker	to construct plasmid NM3467
6059	AATTCGCTCTTCgGCGAGAGACCgcaatGGATCCaaccattGGTCTCAATGaGAAGAGCA	double stranded polyllnker	to construct plasmid NM3468
6060	AGCTTGCTCTTCtCATTGAGACCaatggttGGATCCattgcGGTCTCTCGCcGAAGAGCG	double stranded polyllnker	to construct plasmid NM3468
6061	AATTCGCTCTTCgATGAGAGACCgcaatGGATCCaaccattGGTCTCAAAGgGAAGAGCA	double stranded polyllnker	to construct plasmid NM3469
6062	AGCTTGCTCTTCcCTTTGAGACCaatggttGGATCCattgcGGTCTCTCATcGAAGAGCG	double stranded polyllnker	to construct plasmid NM3469
6063	AATTCGCTCTTCgACGAGAGACCgcaatGGATCCaaccattGGTCTCAGTAgGAAGAGCA	double stranded polyllnker	to construct plasmid NM3470
6064	AGCTTGCTCTTCcTACTGAGACCaatggttGGATCCattgcGGTCTCTCGTcGAAGAGCG	double stranded polyllnker	to construct plasmid NM3470
6133	GGAGGGTTGCGTTTGAGAC	to amplify inserts of DR274 plasmids	to construct plasmids NM3811, NM3813, NM3814
6346	AATTCGCTCTTCgGCGAAGAGACCgcaGGTACCatGGTCTCAGACGcGAAGAGCA	double stranded polylinker	to constsruct plasmid NM3591
6347	AGCTTGCTCTTCgCGTCTGAGACCatGGTACCtgcGGTCTCTTCGCcGAAGAGCG	double stranded polylinker	to constsruct plasmid NM3591
6384	AATGCTCTTCATGGttccggagcagttcaag	to amplify the mec-4 promoter	to construct plasmids NM3617, NM3729, NM3730, NM3731, NM3732, NM3733, NM3734,NM3735, NM3736, NM3752, NM3754
6385	tggGCTCTTCCCATtctataacttgatagcgataa	to amplify the mec-4 promoter	to construct plasmid NM3735
6403	AATGCTCTTCGGGTATGGGCCCTAAAAAGAAGCG	to amplify the GAL4-VP64	to construct plasmid NM3617
6404	CAAGCTCTTCGCGTTTAGTTAATCAGCATGTCCAGG	to amplify the GAL4-VP64	to construct plasmid NM3617
6405	tggGCTCTTCCACCCATtctataacttgatagcgataa	to amplify the mec-4 promoter	to construct plasmid NM3617, NM3729, NM3730, NM3731, NM3732, NM3736
6406	AATGCTCTTCGACGgataaatgcaaaatcctttcaag	to amplify the ttb-2 3' UTR	to construct plasmid NM3617, NM3693, NM3728, NM3730, NM3731
6407	ATTGCTCTTCGTACtgagacttttttcttggcgg	to amplify the ttb-2 3' UTR	to construct plasmid NM3617, NM3693, NM3728, NM3730, NM3731, NM3733, NM3734
6408	AATGCTCTTCATGGcgagttttgactggctttc	to amplify the long rab-3 promoter	to construct plasmid NM3693
6409	tggGCTCTTCCCATctgaaaatagggctactgtag	to amplify the long rab-3 promoter	to construct plasmid NM3693
6419	ccggGAAGTTCCTATTCtctagaaaGTATAGGAACTTCtgca	FRT sequence	to construct plasmid NM3622
6420	GAAGTTCCTATACtttctagaGAATAGGAACTTC	FRT sequence	to construct plasmid NM3622
6421	ccggGAAGTTCCTATACtatttgaaGAATAGGAACTTCtgca	FRT3 sequence	to construct plasmid NM3623
6422	GAAGTTCCTATTCttcaaataGTATAGGAACTTC	FRT3 sequence	to construct plasmid NM3623
6450	TTGCTCTTCATGGcctctgaactggtacctc	to amplfiy Chr II mos site genomic homology arm	to construct plasmid NM3631
6451	AAGCTCTTCACTTcgaaacagactgatatcgaaac	to amplfiy Chr II mos site genomic homology arm	to construct plasmid NM3631
6452	AAGCTCTTCAATGtaacggtcttctgtataactac	to amplfiy Chr II mos site genomic homology arm	to construct plasmid NM3631
6453	TTGCTCTTCATACcttgccattgtttcctg	to amplfiy Chr II mos site genomic homology arm	to construct plasmid NM3631
6454	AAGCTCTTCAGGTGGGAGAAAATGCGGAGAG	to amplfiy rpl-28 promoter	to construct plasmid NM3631
6455	TTGCTCTTCACGTACCTTTTTTTCTGAGCCAATCC	to amplfiy rpl-28 promoter	to construct plasmid NM3631
6456	AAGCTCTTCAACGAGCAGGCTTACGAAGTTCC	to amplify FRT-GFP fragment	to construct plasmid NM3631
6457	TTGCTCTTCACGCGGTCATAAACTGAAACG	to amplify FRT-GFP fragment	to construct plasmid NM3631
6458	GCGGAAGTTCCTATACtatttgaaGAATAGGAACTTC	FRT3 sequence	to construct plasmid NM3631
6459	CATGAAGTTCCTATTCttcaaataGTATAGGAACTTC	FRT3 sequence	to construct plasmid NM3631
6460	AAGCTCTTCAACGggcgaattggagctcc	mcs FRT3 sequence	to construct plasmid NM3638
6461	TTGCTCTTCAACCgatatcgaattcctgcaGAAG	mcs FRT3 sequence	to construct plasmid NM3638
6462	GGTGAAGTTCCTATTCtctagaaaGTATAGGAACTTC	FRT sequence	to construct plasmid NM3638
6463	CATGAAGTTCCTATACtttctagaGAATAGGAACTTC	FRT sequence	to construct plasmid NM3632,NM3638
6464	AAGCTCTTCAATGAAAAAGCCTGAACTCACC	to amplify hygR gene	to construct plasmid NM3632
6465	TTGCTCTTCACGCCTATTCCTTTGCCCTCGGAC	to amplify hygR gene	to construct plasmid NM3632
6466	AAGCTCTTCAGCGGGATGATCGACGCCaAC	to amplify a sqt-1 hs cre fragment	to construct plasmid NM3632
6467	TTGCTCTTCACCAgatcaccaaaaacggaacg	to amplify a sqt-1 hs cre fragment	to construct plasmid NM3632
6469	CGTATAACTTCGTATAATGTATGCTATACGAAGTTAT	loxP site	to construct plasmid NM3638
6471	TACGAAGTTCCTATTCtctagaaaGTATAGGAACTTC	FRT sequence	to construct plasmid NM3638
6472	ACGATAACTTCGTATAGCATACATTATACGAAGTTAT	loxP site	to construct plasmid NM3632
6473	TGGATAACTTCGTATAATGTATGCTATACGAAGTTAT	loxP site	to construct plasmid NM3632
6483	TTGCTCTTCATACgatcaccaaaaacggaacg	to amplify sqt-1 hsp-16 cre	to construct plasmid NM3638
6484	TGGATAACTTCGTATAGCATACATTATACGAAGTTAT	loxP site	to construct plasmid NM3638
6485	CTAGTGGCGAAGAGCCTGCAggtaaccACGCGttGCatGCTCTTCGGTAc	MCS with SapI sites	to construct plasmid NM3643
6486	CCGGgTACCGAAGAGCatGCaaCGCGTggttaccTGCAGGCTCTTCGCCA	MCS with SapI sites	to construct plasmid NM3643
6489	TgtCCTAGGctgtttcgAAGgtaagtttaaaATAACTTC	to amplify FRT-FRT3 fragment	to construct plasmid NM3649
6490	cacctgcaggcagaagaccgttaCATGAAGTTC	to amplify FRT-FRT3 fragment	to construct plasmid NM3649
6495	cctGCTCTTCGATGGTGAGCAAGGGCG	to amplify emerald sequences	to construct plasmid NM3658
6496	tggGCTCTTCGCTTGTACAGCTCGTCCATGC	to amplify emerald sequences	to construct plasmid NM3658
6497	cctGCTCTTCGATGGTCTCAAAGGGTGAAGAAG	to amplify mCherry sequences	to construct plasmid NM3663
6498	tggGCTCTTCGCTTATACAATTCATCCATGCCACCT	to amplify mCherry sequences	to construct plasmid NM3663
6509	cctGCTCTTCGTGGcgcctacctgcctacct	to amplify the scl-6 promoter	to construct plasmid NM3658
6510	tggGCTCTTCGCATAGTGCTCGAGCTGAACTCA	to amplify the scl-6 promoter	to construct plasmid NM3658
6511	cctGCTCTTCGAAGCAACAATTCATAGTTGACCTTCATAACTC	to amplify scl-6 genomic sequences	to construct plasmid NM3658
6512	tggGCTCTTCGTACgggattctcttgcagaatggg	to amplify scl-6 genomic sequences	to construct plasmid NM3658
6519	cctGCTCTTCGtggaagtgagagagaaatgtgtgtgt	to amplify the lys-8 promoter	to construct plasmid NM3663
6520	tggGCTCTTCGcatCTTGACGGAGACTGAAGCC	to amplify the lys-8 promoter	to construct plasmid NM3663
6521	cctGCTCTTCGaagGTCCTTCCATTCGTTGACTCA	to amplify the lys-8 coding sequences	to construct plasmid NM3663
6522	tggGCTCTTCGtacgaaaattagagccaagctcgca	to amplify the lys-8 coding sequences	to construct plasmid NM3663
6528	TCCCGGGTGCGCGCTCTTCtGTTCGCATTTTCTCCCACCctg	to create a sqt-1 cre SEC minimos vector	to construct plasmid NM3666
6529	ACCCGGGACTAGTGCTCTTCaGTAGtaacggtcttctgcctgc	to create a sqt-1 cre SEC minimos vector	to construct plasmid NM3666
6546	attGGTCTCAgATGGTTTCAAAGGGTGAAGAAGATAACATGGCA	to amplify mCherry sequences	to construct plasmid NM3674
6547	taaGGTCTCTcCTTATACAATTCATCCATGCCACCTGTC	to amplify mCherry sequences	to construct plasmid NM3674
6548	ATGTCtAGACTGGATAAATCGAAGGTC	to amplify vector and rtetR-QFAD::P2A::mKate::T2A::tetR-pie-1	to construct plasmid NM3672
6549	CACAAACTGCAGGCATGCAAGC	to amplify vector and rtetR-QFAD::P2A::mKate::T2A::tetR-pie-1	to construct plasmid NM3672
6550	AGTCTaGACATttttgttagattggtaggagctg	to PCR the phat-5 promoter	to construct plasmid NM3666, NM3672, NM3673
6551	AGTCTaGACATttttgttagattggtaggagctg	to amplify the Y8A9A.2 promoter	to construct plasmid NM3673
6552	AGACTGCAGcttgcatgcccgtcttc	to amplify tetO 7X ∆pes-10	to construct plasmid NM3671
6553	CATGCTAGCCATttttctaccggctgaaagttaa	to amplify tetO 7X ∆pes-10	to construct plasmid NM3671
6563	caaaagccctactatcaacgc	to amplify jsTi1453 inserts	to characterize insertions in Figure S3
6564	catcccattcacggcacaac	to amplify jsTi1453 inserts	to characterize insertions in Figure S3
6566	AAGCTCTTCACCAGCGGAGAGAAGAACCCAGC	to amplify 3649 plasmid vector	to construct plasmid NM3689
6567	AAGCTCTTCAgatttcctaccggattcgtctcc	to amplify 3649 plasmid vector	to construct plasmid NM3689
6568	AAGCTCTTCAatcgacaagtctctgcttctcg	to amplify 3649 plasmid vector	to construct plasmid NM3689
6569	AAGCTCTTCACTCCGCATTTTCTCCCACCctg	to amplify 3649 plasmid vector	to construct plasmid NM3689
6570	AAGCTCTTCAGAGCATGCGGCCGCATATCAG	to amplify the mex-5p FLP sl2 mNeonGreen operon	to construct plasmid NM3689
6571	AAGCTCTTCATGGGGAAAGCCGGGTTACCAT	to amplify the mex-5p FLP sl2 mNeonGreen operon	to construct plasmid NM3689
6574	GGCCGCAGCGATCGCATC	to amplify entire insert in pLF3FShC plasmids	to characterize insertions in Figure S3
6575	TGGCTGAATTCGCTCTTCgTGGcttgcatgcccgtc	to amplify tetO 7X ∆pes-10	to construct plasmid NM3695, NM3770
6576	GAGAAGCTTGCTCTTCCCATttttctaccggctg	to amplify tetO 7X ∆pes-10	to construct plasmid NM3695
6577	TGGCTGAATTCGCTCTTCGAAGTAAtaaatgcaaaatcctttcaagc	to amplify the tbb-2 3'UTR	to construct plasmid NM3694
6578	GAGAAGCTTGCTCTTCGTACtgagacttttttcttggcg	to amplify the tbb-2 3'UTR	to construct plasmid NM3694
6579	GCGACGTACGACAGGATCCACACTGCAG	double stranded polylinker	to construct plasmid NM3696
6580	CGTCCTGCAGTGTGGATCCTGTCGTACG	double stranded polylinker	to construct plasmid NM3696
6581	CCCGTACGAACTAGGctgtttcgAAGg	to remove mos left arm	to construct plasmid NM3721
6582	GCTCCTGGTGGTCCAACTGG	to remove mos left arm	to construct plasmid NM3721
6585	GATCCaaccattGGTCTCAGGTAGAAGAGCA	double stranded polylinker	to construct plasmid NM3701
6586	AGCTTGCTCTTCTACCTGAGACCaatggttG	double stranded polylinker	to construct plasmid NM3701
6591	gaGGTCTCAgTGGTCAGATCTCGAGCTCAAGC	to amplify UAS 11X enhancer	to construct plasmid NM3700
6592	GTGGTCTCTTCGCTACCCTCTAGAGTCGACC	to amplify UAS 11X enhancer	to construct plasmid NM3700
6593	gcGGTCTCAggcgtgatcgattttttgc	to amplify ∆pes-10 basal promoter	to construct plasmid NM3706
6594	gcGGTCTCTtCATttttctaccggctga	to amplify ∆pes-10 basal promoter	to construct plasmid NM3706
6595	gTGGTTACTGTACATCCATACAGTAAGTACTGTACATCCATACAGTAAGTACTGTACAT	lexO fragment	to construct plasmid NM3703
6596	CCATACAGTAAGTACTGTACATCCATACAGTAAGTACTGTACATCCATACAGTAA	lexO fragment	to construct plasmid NM3703
6597	ATGGATGTACAGTACTTACTGTATGGATGTACAGTACTTACTGTATGGATGTACAGTAA	lexO fragment	to construct plasmid NM3703
6598	TCGCTTACTGTATGGATGTACAGTACTTACTGTATGGATGTACAGTACTTACTGT	lexO fragment	to construct plasmid NM3703
6599	gTGGGTAATCGCTTATCCTCGGATAAACAATTATCCTCACGGGTAA	QUAS fragment	to construct plasmid NM3704
6600	TCGCTTATCCGCTCGGGTAATCGCTTATCCTCGGGTAATCGCTTATCCTT	QUAS fragment	to construct plasmid NM3704
6601	GCGATTACCCGTGAGGATAATTGTTTATCCGAGGATAAGCGATTAC	QUAS fragment	to construct plasmid NM3704
6602	TCGCAAGGATAAGCGATTACCCGAGGATAAGCGATTACCCGAGCGGATAA	QUAS fragment	to construct plasmid NM3704
6603	AAGCTCTTCGGGTATGCCGCCTAAACGCAAG	to amplify QF DNA binding domain	to construct plasmid NM3711
6604	TTGCTCTTCGCGCAGGGATCAGAGGTGGG	to amplify QF DNA binding domain	to construct plasmid NM3711
6605	CCAGTCGACATAACTTCGTATAGCATACATTATACGAAGTTATtacgcgcgctcactg	to amplify 3643 plasmid vector	to construct plasmid NM3708
6606	TCCtgcaggtggagctccagcttttg	to amplify 3643 plasmid vector	to construct plasmid NM3708
6613	tagacgcgaaggtctcggcac	to amplify jsTi1490 inserts	to characterize insertions in Figure S3
6614	GAAATGGGCAGAAGCATctgg	to amplify jsTi1490 inserts	to characterize insertions in Figure S3
6617	tcagtcctcgagcagtcagg	to amplify jsTi1493 inserts	to characterize insertions in Figure S3
6618	ttcgcaaaccgtctgcgtctc	to amplify jsTi1493 inserts	to characterize insertions in Figure S3
6619	AGCCAAGTAGAAGGTGCAAAAG	to amplify jsTi1492 inserts	to characterize insertions in Figure S3
6621	AGGTCTCaGGGTATGTCtAGACTGGATAAATC	to amplify rtetR	to construct plasmid NM3738
6622	AGGTCTCaGGAGAGCATCCAAAAGTGC	to amplify rtetR	to construct plasmid NM3738
6623	AGGTCTCaCTCCCAATTGAAATGTTGGATAG	to amplify rtetR	to construct plasmid NM3738,characterization of jsIs1528 insertion in Figure S3 H
6624	AGGTCTCaTCGCTCCTCCTCCCG	to amplify rtetR	to construct plasmid NM3738
6642	TAAGCTAGCAGGCTGAAAACTACCCCAC	to amplify the his-58 3' UTR	to construct plasmid NM3746
6643	gcctgcaggCATGAAGTTCCTATTCttcaaataGTATAGGAACTTCCCTTTCTCTGTGC	to amplify the his-58 3' UTR	to construct plasmid NM3746
6647	CCGCTCTTCattgatatcgaattcctgcagccc	to amplify mec-4p rtetR-QF	to construct plasmid NM3752
6648	AAGCTCTTCACAAgcggccgctctagaaCT	to amplify UAS 11X GFP-C1	to construct plasmid NM3754
6649	ccGCTCTTCaTTGcgacggtatcgataagctTAC	to amplify mec-4p GAL4-QF	to construct plasmid NM3754
6650	ttggtctcagaagtaaattttttgccccttccacc	to amplify the act-4 3' UTR	to construct plasmid NM3751
6651	gcggtctctctacccgctcagtattggct	to amplify the act-4 3' UTR	to construct plasmid NM3751
6668	GAGAAGCTTGCTCTTCTCGCacgcctacctcgac	to amplify tet0 7X enhancer	to construct plasmid NM3770
6669	tGGTCTCAgGCGagatgtgactcctccc	to amplify ∆mec-7 basal promoter	to construct plasmid NM3767
6670	cGGTCTCTtCATgttgcttgaaatttggac	to amplify ∆mec-7 basal promoter	to construct plasmid NM3767
6671	tGGTCTCAgGCGaaaaaggtggaaatgagtat	to amplify ∆hsp-16.1 basal promoter	to construct plasmid NM3769
6672	cGGTCTCTtCATgattgtagtttgaagatttcac	to amplify ∆hsp-16.1 basal promoter	to construct plasmid NM3769
6673	tGGTCTCAgGCGagatgtgactcctccc	to amplify ∆myo-2 basal promoter	to construct plasmid NM3768
6674	cGGTCTCTtCATttctgtgtctgacgatcg	to amplify ∆myo-2 basal promoter	to construct plasmid NM3768
6675	aagtgcagtcataTATCAGGTGTAC	to amplify jsTi1492 inserts	to characterize insertions in Figure S3
6676	AATGCTCTTCGACGtaaatgcaaaatcctttcaagca	to amplify the tbb-2 3' UTR	to construct plasmid NM3777
6710	CGCTCTTCgGCGCGTCAACTTGAGCTCCC	to amplify the activation domain of QF2	to construct plasmid NM3800
6711	TGCTCTTCgCGTTTATTGCTCATAGGTGTTG	to amplify the activation domain of QF2	to construct plasmid NM3800
6712	aGGTCTCagGGTATGCCGCCTAAACGC	to amplify the DNA binding domain of QF2	to construct plasmid NM3791
6713	aGGTCTCatCGCGAGAAGACGGGTGATGC	to amplify the DNA binding domain of QF2	to construct plasmid NM3791
6718	AGCTTGCTCTTCgCGTCGAGACCatGGTACCtgcGGTCTCTCGCcGAAGAGCG	double stranded polylinker	to construct plasmid NM3773
6719	AATTCGCTCTTCgGCGAGAGACCgcaGGTACCatGGTCTCGACGcGAAGAGCA	double stranded polylinker	to construct plasmid NM3773
6723	ttGGTCTCagGCGGGTTCTGGATCTGGATCTGGAGGTTCCGGTCGTCAACTTGAGCTCCC	to amplify QF activation domain with a flex linker	to construct plasmid NM3808
6724	gcGGTCTCTgCGTTTATTGCTCATAGGTGTTG	to amplify QF activation domain with a flex linker	to construct plasmid NM3808
6728	aGCTCTTCaATGCCaCCaAAACGCAAG	to amplify QF N-terminal region	to construct plasmid NM3810 and NM3811
6729	aGCTCTTCaTCTTCCAAGTGCCTTCGATG	to amplify QF N-terminal region	to construct plasmid NM3810
6730	aGCTCTTCaAGAACTTTTCCCCGCCTACTCC	to amplify QF C-terminal region	to construct plasmid NM3810
6731	aGCTCTTCaCTTCTATTGCTCATACGTGTTGATATC	to amplify QF C-terminal region	to construct plasmid NM3810
6732	CGCTCTTCgATGTCACGTCTAGATAAATCCAAGGTCATCAACTC	to amplify rtetR	to construct plasmid NM3814
6733	CGCTCTTCgATGCCACCAAAGAAGAAGCG	to amplify the DNA binding domain of lexA	to construct plasmid NM3813
6734	aGCTCTTCaCTTTTATTGCTCATAGGTGTTGATG	to amplify the activation domain of QF2	to construct plasmid NM3811
6736	tGaaattttcagGTCCATCTCGG	to introduce stop codons in intron of tetR	to construct plasmid NM3817
6737	Ttaatcagggttagttagtatatatatg	to introduce stop codons in intron of tetR	to construct plasmid NM3817
6745	cGGTCTCggATGTCACGTCTAGATAAATCCAAGGTCATCAACTC	to amplify the N-terminal region of tetR	to construct plasmid NM3821
6746	cGGTCTCgATCTTCGAGGACGCATCCG	to amplify the N-terminal region of tetR	to construct plasmid NM3821
6747	cGGTCTCgAGATCAAGAACATCAAGTTGC	to amplify the middle domain of the tetR	to construct plasmid NM3821
6748	cGGTCTCgGGTGATCGAAAAGTTCGATAGCTTGTCTCAAAAGTGGTGGCATTG	to amplify the middle domain of the tetR	to construct plasmid NM3821
6749	cggtctcgccttttattgctcataggtgttgatg	to amplify the linker and QF activation domain	to construct plasmid NM3821
6750	cggtctctcaccaaggagcagaaccagc	to amplify the linker and QF activation domain	to construct plasmid NM3821
6764	GCTTCAACTGACAATTCTCTCCC	to amplify sri-34 sequences	to characterize js1503 and js1540 in figure S3 I
6765	TCAGCTGATCCTCTCTTCTGG	to amplify sri-34 sequences	to characterize js1503 and js1540 in figure S3 I
6766	GATGCACCATGCTCCACCC	to amplify fbxc-55 sequences	to characterize js1503 and js1540 in figure S3 I
6767	CTCAGCTCCTGATAAAGCCG	to amplify fbxc-55 sequences	to characterize js1503 and js1540 in figure S3 I
